# Supplementary material
Source: ML conference proceedings conference paper supplement (https://proceedings.mlr.press/v115/gouvert20a.html)
Supplement: Supplementary file [file gouvert20a-supp.pdf]

# Supplementary Material: Recommendation from Raw Data with Adaptive Compound Poisson Factorization

Olivier Gouvert, Thomas Oberlin, Cédric Févotte  
 IRIT, Université de Toulouse, CNRS, France  
 firstname.lastname@irit.fr

## 1 Stirling Numbers

The Stirling numbers of the three kinds are three different ways to partition  $y$  elements into  $n$  groups.

- The Stirling number of the first kind corresponds to the number of ways of partitioning  $y$  elements into  $n$  disjoint cycles.
- The Stirling number of the second kind corresponds to the number of ways of partitioning  $y$  elements into  $n$  non-empty subsets.
- The Stirling number of the third kind (also known as Lah number) corresponds to the number of ways of partitioning  $y$  elements into  $n$  non-empty ordered subsets.

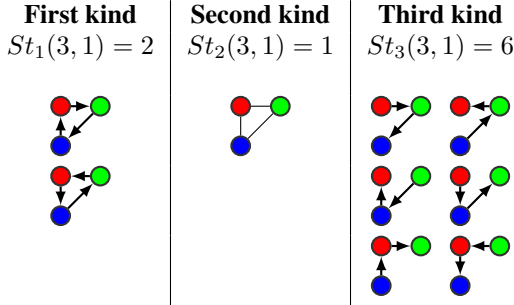

Figure 1: Illustration of the Stirling numbers of the three kinds for  $y = 3$  and  $n = 1$ .

## 2 Proof of limit cases

**Proposition 1.** *If there exists  $\theta^{raw}$  such that  $\lim_{\theta \rightarrow \theta^{raw}} \kappa^T \psi(\theta) = -\infty$ , then the posterior of dcPF tends to the posterior of PF as  $\theta$  goes to  $\theta^{raw}$ .*

**Proposition 2.** *If there exists  $\theta^{bin}$  such that  $\lim_{\theta \rightarrow \theta^{bin}} \kappa^T \psi(\theta) = +\infty$ , then the posterior of dcPF tends to the posterior of PF applied to binarized data as  $\theta$  goes to  $\theta^{bin}$ , i.e.:  $\lim_{\theta \rightarrow \theta^{bin}} p(\mathbf{W}, \mathbf{H} | \mathbf{Y}) = p(\mathbf{W}, \mathbf{H} | \mathbf{N} = \mathbf{Y}^b)$ .*

*Proof.* Let  $\lambda \in \mathbb{R}_+$ ,  $n \sim \text{Poisson}(\lambda)$  and  $y|n \sim ED(\theta, n\kappa)$  with support given by  $S = \{n, \dots, +\infty\}$ :

$$p(n|\lambda) = \frac{\lambda^n e^{-\lambda}}{n!}, \quad (1)$$

$$p(y|n) = \exp(y\theta - n\kappa^T \psi(\theta)) h(y, n\kappa), \quad y \in S, \quad (2)$$

where  $\kappa$  and  $\psi(\theta)$  can either be scalars or vectors of the same dimension. In both cases,  $\kappa^T \psi(\theta) \in \mathbb{R}$ . We denote by  $r = \lambda e^{-\kappa^T \psi(\theta)}$ .

We have the following posterior distribution for  $y > 0$ :

$$p(n|y) = \frac{r^n h(y, n\kappa) (n!)^{-1}}{\sum_{m=1}^y r^m h(y, m\kappa) (m!)^{-1}}, \quad n \in \{1, \dots, y\}. \quad (3)$$

Thus, for fixed  $\kappa$  and  $y > 0$ , we have that:

$$\sum_{m=1}^y r^m h(y, m\kappa) (m!)^{-1} \underset{r \rightarrow +\infty}{\sim} r^y h(y, y\kappa) (y!)^{-1} \quad (4)$$

$$\underset{r \rightarrow 0}{\sim} r h(y, \kappa). \quad (5)$$

It follows:

$$p(n|y) \xrightarrow{r \rightarrow +\infty} \delta_y(n) \quad (6)$$

$$p(n|y) \xrightarrow{r \rightarrow 0} \delta_1(n). \quad (7)$$

From these results we can deduce that, in dcPF, assuming:

- there exists  $\theta^{raw}$  such that  $\lim_{\theta \rightarrow \theta^{raw}} \kappa^T \psi(\theta) = -\infty$ ,
- there exists  $\theta^{bin}$  such that  $\lim_{\theta \rightarrow \theta^{bin}} \kappa^T \psi(\theta) = +\infty$ .

Then, we have the following limit cases:

$$\begin{aligned}
p(\mathbf{N}|\mathbf{Y}) &= \int_{\mathbf{W}, \mathbf{H}} p(\mathbf{N}|\mathbf{Y}, \mathbf{W}, \mathbf{H})p(\mathbf{W}, \mathbf{H}|\mathbf{Y})d\mathbf{W}d\mathbf{H} \\
&\xrightarrow{\theta \rightarrow \theta^{\text{raw}}} \int_{\mathbf{W}, \mathbf{H}} \delta_{\mathbf{Y}}(\mathbf{N}) p(\mathbf{W}, \mathbf{H}|\mathbf{Y})d\mathbf{W}d\mathbf{H} = \delta_{\mathbf{Y}}(\mathbf{N}) \\
&\xrightarrow{\theta \rightarrow \theta^{\text{bin}}} \int_{\mathbf{W}, \mathbf{H}} \delta_{\mathbf{Y}^b}(\mathbf{N}) p(\mathbf{W}, \mathbf{H}|\mathbf{Y})d\mathbf{W}d\mathbf{H} = \delta_{\mathbf{Y}^b}(\mathbf{N}).
\end{aligned} \tag{8}$$

And finally, for the posterior distribution:

$$p(\mathbf{W}, \mathbf{H}|\mathbf{Y}) = \int_{\mathbf{N}} p(\mathbf{W}, \mathbf{H}|\mathbf{N})p(\mathbf{N}|\mathbf{Y})d\mathbf{N} \tag{9}$$

$$\xrightarrow{\theta \rightarrow \theta^{\text{raw}}} p(\mathbf{W}, \mathbf{H}|\mathbf{N} = \mathbf{Y}) \tag{10}$$

$$\xrightarrow{\theta \rightarrow \theta^{\text{bin}}} p(\mathbf{W}, \mathbf{H}|\mathbf{N} = \mathbf{Y}^b), \tag{11}$$

where  $p(\mathbf{W}, \mathbf{H}|\mathbf{N})$  is the posterior of a PF model with raw or binarized observations respectively.  $\square$

### 3 Adaptivity of dcPF to over-dispersion

Table 1: Mean, variance and ratio var/mean of the non-zero values for each dataset. Learned parameters for each model and each dataset.

|                     | <b>Taste Profile</b> | <b>NIPS</b> | <b>Last.fm</b> |
|---------------------|----------------------|-------------|----------------|
| mean of non-zeros   | 2.66                 | 2.74        | 3.86           |
| var of non-zeros    | 25.94                | 20.87       | 65.72          |
| ratio var/mean      | 9.8                  | 7.6         | 17.0           |
| Log - $p$           | 0.80                 | 0.74        | 0.90           |
| ZTP - $p$           | 1.95                 | 1.40        | 2.35           |
| Geo - $p$           | 0.60                 | 0.51        | 0.69           |
| sh. NB - $p$        | 0.87                 | 0.86        | 0.90           |
| sh. NB - $\kappa_2$ | 0.21                 | 0.17        | 0.27           |

Table 1 illustrates how the natural parameter  $\theta = \log(p)$  is strongly correlated to the variance-mean ratio of the non-zero values of the datasets. Hence, it illustrates the adaptivity of dcPF to over-dispersion.
